# Supplementary material for: Selective disruption of each part of Janus molecular assemblies by lateral diffusion of stimuli-responsive amphiphilic peptides
Source: Royal Society of Chemistry journal article supplement (doi:10.1039/c4cc08686d), 2014-12-05
Supplement: c4cc08686d1.pdf [file c4cc08686d1.pdf]

## Electronic Supplementary Information

### Selective Disruption of Each Part of Janus Molecular Assemblies by Lateral Diffusion of Stimuli-Responsive Amphiphilic Peptide

*Motoki Ueda,<sup>†</sup> Akihiro Uesaka,<sup>‡</sup> and Shunsaku Kimura<sup>\*‡</sup>*

<sup>†</sup>Clinical Division of Diagnostic Radiology, Kyoto University Hospital

54 Shogoin Kawara-cho, Sakyo-ku, Kyoto, 606-8507, Japan

<sup>‡</sup>Department of Material Chemistry, Graduate School of Engineering, Kyoto University

Kyoto-Daigaku-Katsura, Nishikyo-ku, Kyoto, 615-8510, Japan

## CONTENTS

1. Amphiphilic polypeptide, **SHLL**, **SLL** and **SDL**
2.  $pK_a$  value of the His residues in **SHLL** aggregate (Fig. S1)
3. Wide-area TEM images (Fig. S2 and S3)
4. Stability of **SLL** + **SDL** vesicle at pH 5 with the heat treatment (Fig. S4)
5. Diameter of the neck part in three kinds of round-bottom flask-shaped assemblies (Fig. S5)

## 1. Amphiphilic polypeptides, **SHLL**, **SLL** and **SDL**

pH-responsive amphiphilic polypeptide **SHLL** used in this paper was the same compound used in previous report.[1] The other amphiphilic polypeptides, **SLL** and **SDL** also are the same compounds in our reports.[2, 3] The identification and synthesis of them were shown there.[1-3]

## 2. $pK_a$ value of the His residues in SHLL aggregate

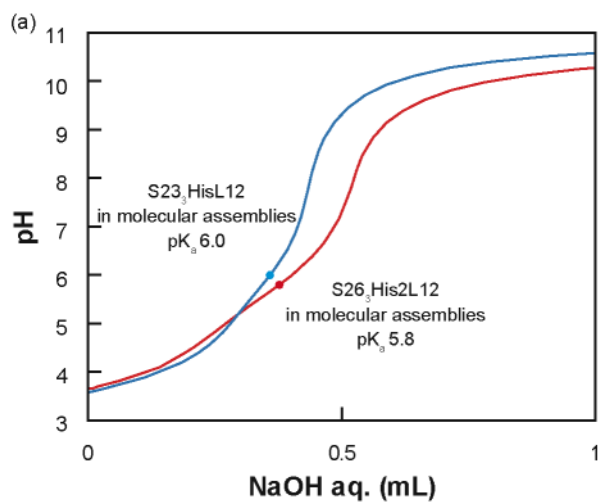

**Fig. S1.** The experimental titration curves obtained for aqueous solutions of aggregate prepared from  $((\text{Sar})_{26})_3\text{-}b\text{-}((\text{L-His})_2\text{-}(\text{L-Leu-Aib})_6)$  (**SHLL**) (red line). This data has already been shown in previous report.[1]

### 3. Wide-area TEM images

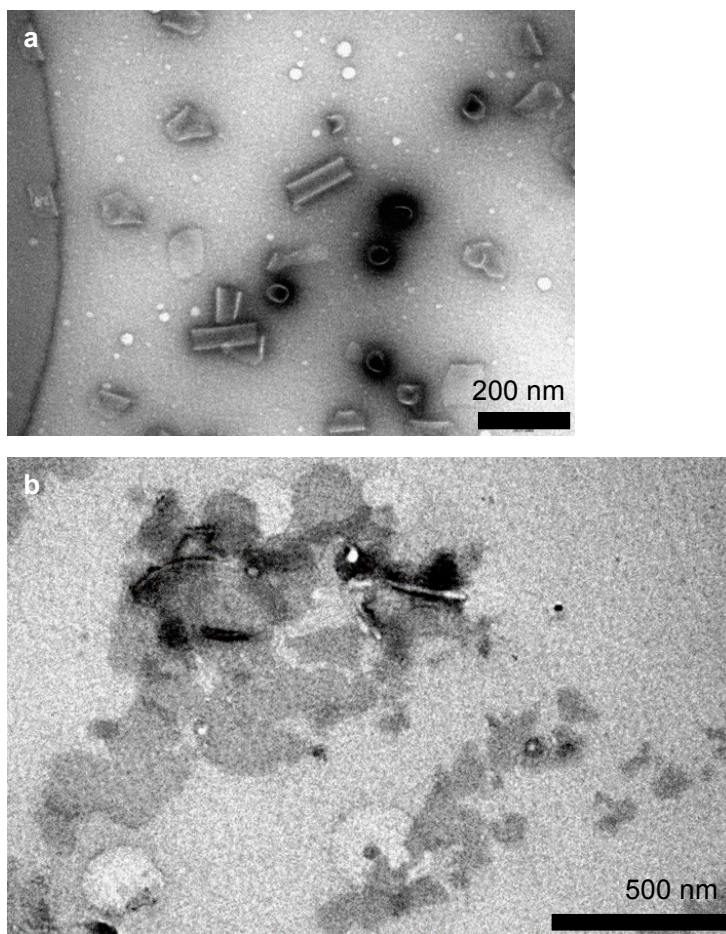

**Fig. S2.** TEM images of molecular assemblies composed of a single component of **SHLL** (a) and an equimolar mixture of **SHLL** + **SDL** (b) after changing pH from 7.4 to 5.0 and heating at 70 °C for 1

h.

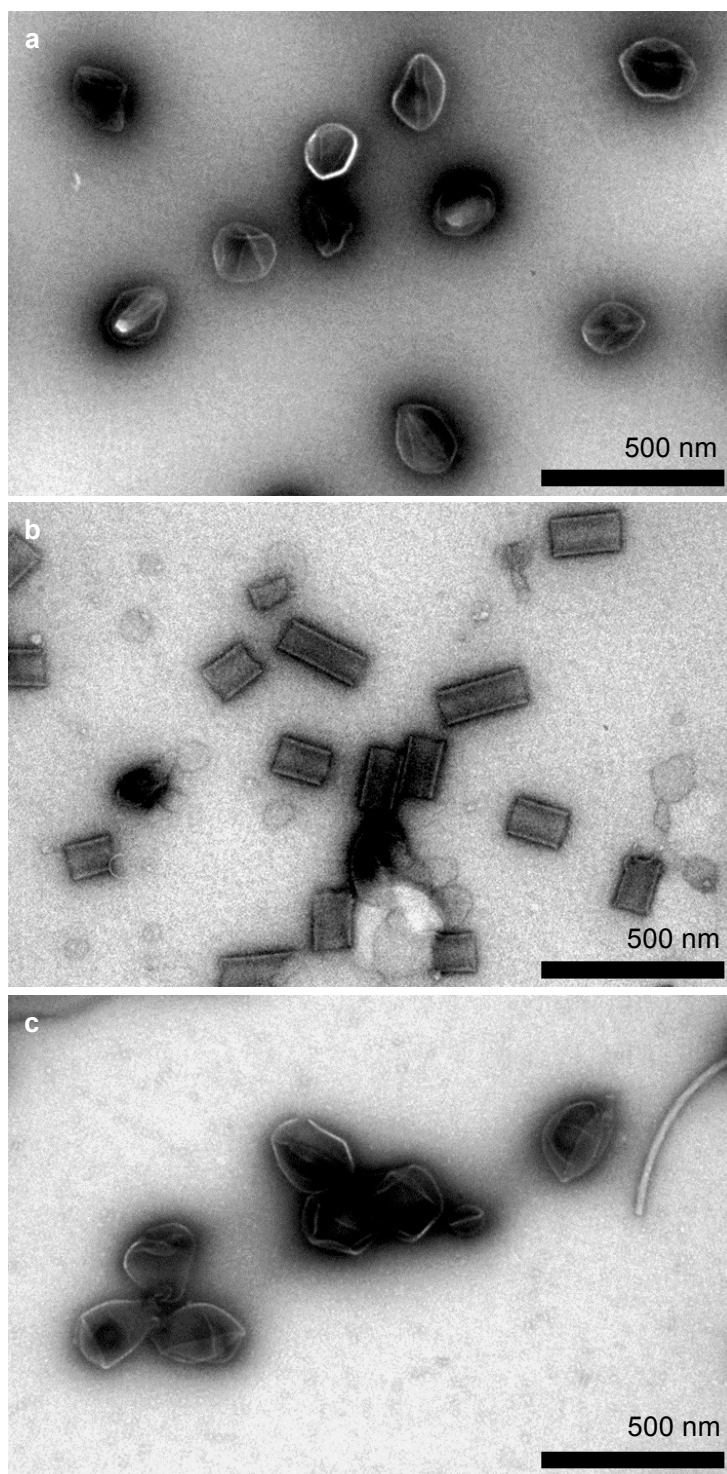

**Fig. S3.** TEM images of molecular assemblies prepared from a mixture of **SHLL** nanotube and **SLL** + **SDL** vesicle (a), **SDL** nanotube and **SHLL** + **SDL** vesicle (b) and **SLL** nanotube and **SHLL** + **SDL** vesicle (c) after changing pH from 7.4 to 4.7 (a) or 5.0 (b, c) and heating at 70 °C for 1 h.

4. Stability of SLL + SDL vesicle at pH 5 with the heat treatment

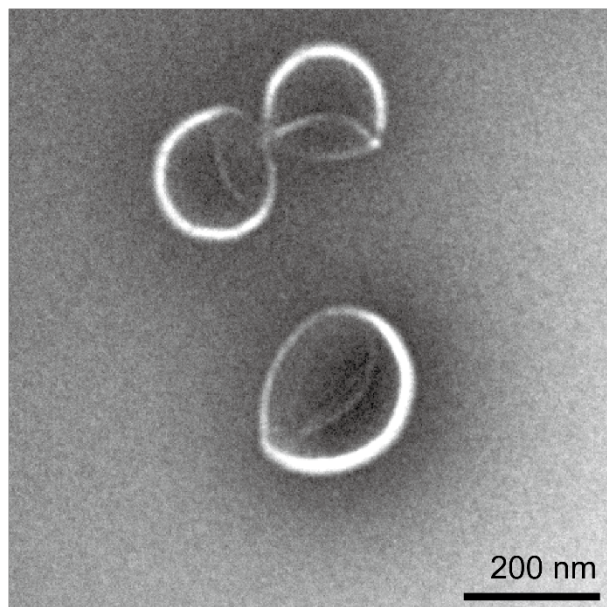

**Fig. S4.** TEM images of SLL + SDL vesicle at pH 5 with the heat treatment (70 °C, 1 h).

## 5. Diameter of the neck part in three kinds of round-bottom flask-shaped assemblies

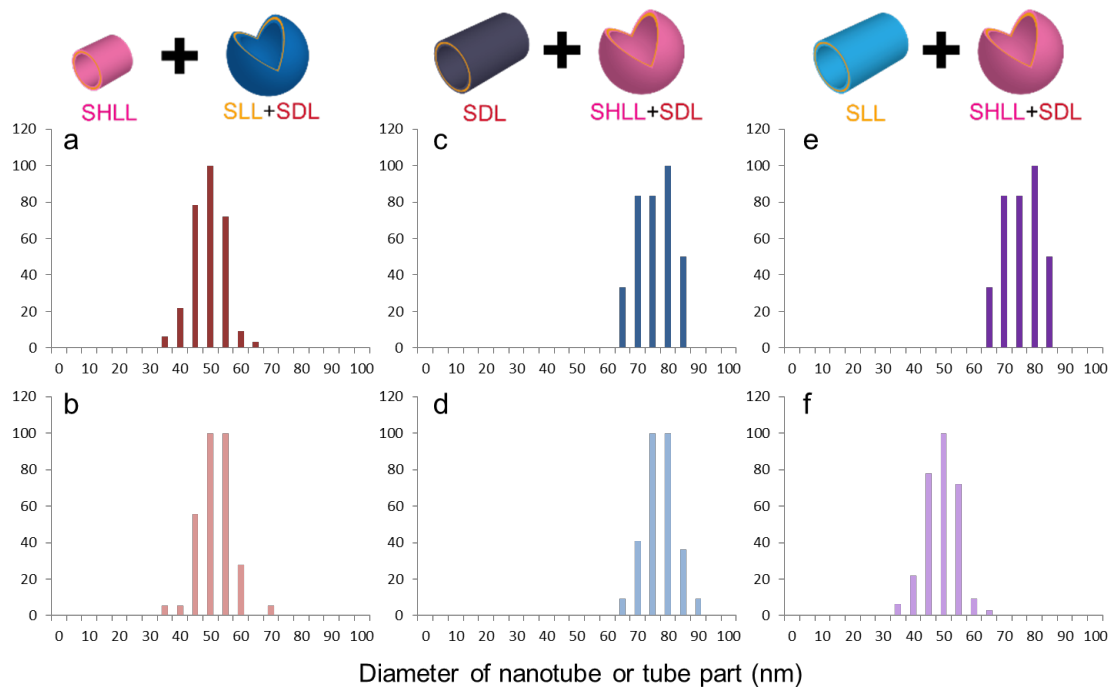

**Fig. S5.** The diameter of the nanotube before heating (a, c, e) and the tube part in the round-bottom flask-shaped assembly after heating (b, d, f) about three kinds of patchwork assemblies prepared from the **SHLL** nanotube and the **SLL + SDL** sheets (a, b), the **SDL** nanotube and the **SHLL + SDL** sheets (c, d), and the **SLL** nanotube and **SHLL + SDL** sheet (e, f). All assemblies were heated at 90 °C for 1 h.



## Reference

1. Uesaka A, Ueda M, Makino A, Imai T, Sugiyama J, Kimura S. Morphology Control between Twisted Ribbon, Helical Ribbon, and Nanotube Self-Assemblies with His-Containing Helical Peptides in Response to pH Change. *Langmuir*. 2014;30(4):1022-1028.
2. Ueda M, Makino A, Imai T, Sugiyama J, Kimura S. Transformation of peptide nanotubes into a vesicle via fusion driven by stereo-complex formation. *Chem Commun*. 2011;47(11):3204-3206.
3. Kanzaki T, Horikawa Y, Makino A, Sugiyama J, Kimura S. Nanotube and Three-Way Nanotube Formation with Nonionic Amphiphilic Block Peptides. *Macromol Biosci*. 2008;8(11):1026-1033.
